# Supplementary material for: Use and impact of point-of-care ultrasonography in general practice: a prospective observational study
Source: PubMed Central journal article supplement — BMJ Open. 2020 Sep 17;10(9):e037664. doi: 10.1136/bmjopen-2020-037664 (PMC7500300; doi:10.1136/bmjopen-2020-037664), 2020-09-17
Supplement: bmjopen-2020-037664supp001.pdf [file bmjopen-2020-037664supp001.pdf]

## Appendix 1: Recruitment of participating general practitioners

General practitioners (GPs) were recruited through ultrasound networks, conferences, and teaching sessions. Interested GPs were asked to answer a questionnaire including background information. We included the first 20 GPs, who based on the questionnaire, met the inclusion criteria and not the exclusion criteria.

Between January 2018 and August 2018, 20 general practitioners from 18 general practice clinics were included through the Danish society of ultrasound in general practice (N=10), an ultrasound group on Facebook (N=8), and teaching sessions (N=2).

### Questionnaire including background characteristics

| Question number | Question                                                                                                           | Category     |
|-----------------|--------------------------------------------------------------------------------------------------------------------|--------------|
| BQ 1.1          | How old are you?                                                                                                   | Age          |
| BQ 1.2          | Are you a woman/man?                                                                                               | Gender       |
| BQ 1.3          | How many years have you been a GP?                                                                                 | Experience   |
| BQ 1.4          | Which year did you graduate as a doctor?                                                                           | Experience   |
| BQ 1.5          | How long have you been using ultrasound?                                                                           | Experience   |
| BQ 1.6          | Would you characterize your practice as a predominantly rural, urban or mixed                                      | Location     |
| BQ 1.7          | How is your practice organized? (solo, partnership, collaboration)                                                 | Organization |
| BQ 1.8          | How many patients are assigned to your practice?                                                                   | Organization |
| BQ 1.9          | How many days a week do you do clinical work?                                                                      | Organization |
| BQ 2.0          | In which region do you practice?                                                                                   | Location     |
| BQ 2.1          | What is the approximate distance from your practice to the nearest radiology department where US can be performed? | Location     |
| BQ 2.2          | What kind of US device (name, model, year) and probes do you have?                                                 | Equipment    |
| BQ 2.3          | What kind of ultrasound education/training did you receive?                                                        | Experience   |
| BQ 2.4          | Which anatomical areas do you scan with ultrasound?                                                                | use          |
| BQ 2.5          | How often do you use ultrasound?                                                                                   | Frequency    |
| BQ 2.6          | Do you have a conflict of interest, participating in this study?                                                   | COI          |
