# Supplementary material for: Use and impact of point-of-care ultrasonography in general practice: a prospective observational study
Source: PubMed Central journal article supplement — BMJ Open. 2020 Sep 17;10(9):e037664. doi: 10.1136/bmjopen-2020-037664 (PMC7500300; doi:10.1136/bmjopen-2020-037664), 2020-09-17
Supplement: bmjopen-2020-037664supp003.pdf [file bmjopen-2020-037664supp003.pdf]

## Appendix 3: Before-After Questionnaire

### Developing the before-after questionnaire:

The registration tools included a before-after PoC-US questionnaire developed on the basis of an interview study conducted in Danish general practice(16). The questionnaire was pilot tested in consecutive rounds of one-week registrations - first by the authors (CAA and MBJ) and secondly by five GPs. Adaptions followed after each round according to feedback from both GPs and patients.

The before-after questionnaire was developed to avoid missing values. However, missing data occurred when the GP aborted the questionnaire before completing the registration (N=4), when the GP declared that he/she was unable to produce the ultrasound images due to e.g. bowel gas (N=13) or in cases where the time separation between before and after registrations was below one minute. In these cases, we assumed there was no separation between the registrations and the before registration was deleted (N=29).

### Questions BEFORE the use of POC-US:

| Question number | Question                                                       | Possible answers                                                                                                                                                                                                                                                                              |
|-----------------|----------------------------------------------------------------|-----------------------------------------------------------------------------------------------------------------------------------------------------------------------------------------------------------------------------------------------------------------------------------------------|
| PQ 1.1          | GP ID number                                                   | GPxx                                                                                                                                                                                                                                                                                          |
| PQ 1.2          | Patient ID number                                              | Pxxx                                                                                                                                                                                                                                                                                          |
| PQ 1.3          | Date                                                           | Dxxxxxxxx                                                                                                                                                                                                                                                                                     |
| PQ 1.4          | Patient gender                                                 | Male/female                                                                                                                                                                                                                                                                                   |
| PQ 1.5          | Patient Age                                                    | xxx years                                                                                                                                                                                                                                                                                     |
| Q 1.1           | What is the main reason to use POC-US in this patient?         | Rule-in/Rule-out<br>Explore                                                                                                                                                                                                                                                                   |
| Q 1.2           | Which organs/positions do you expect to scan?                  | Organs on list                                                                                                                                                                                                                                                                                |
| Q 1.3           | What is the main tentative diagnosis for this patient?         | ICPC2 codes                                                                                                                                                                                                                                                                                   |
| Q 1.4           | Are there any other possible tentative diagnoses in this case? | ICPC2 codes                                                                                                                                                                                                                                                                                   |
| Q 1.5           | What is your overall plan for this patient?                    | Acute admission to hospital<br>Subacute referral to hospital<br>Elective referral hospital<br>Subacute referral to specialist<br>Elective referral to specialist<br>Referral to radiology<br>Other referral e.g. physiotherapist<br>Follow-up in the clinic<br>No plan for follow-up<br>Other |
| Q 1.6           | Which treatment will you initiate at this stage?               | Medication<br>I will refer for treatment<br>I will initiate other treatment<br>None<br>Other                                                                                                                                                                                                  |

### Questions AFTER the use of POC-US:

| Question number | Question                                                                                   | Possible answers          |
|-----------------|--------------------------------------------------------------------------------------------|---------------------------|
| Q 2.1           | How much time did you use on the POC-US examination?                                       | Minutes                   |
| Q 2.2           | Which organs/positions did you scan?                                                       | Organs in drop-down menu  |
| Q 2.3           | Were you able to produce ultrasound images of the relevant structures of (inserted text) ? | Yes<br>No – why not?      |
| Q 2.4           | What did you find?                                                                         | Certain positive findings |

|       |                                                                                                                                     |                                                                                                                                                                                                                                                                                               |
|-------|-------------------------------------------------------------------------------------------------------------------------------------|-----------------------------------------------------------------------------------------------------------------------------------------------------------------------------------------------------------------------------------------------------------------------------------------------|
|       |                                                                                                                                     | Uncertain positive findings<br>Certain negative findings<br>Uncertain negative findings<br>Incidental findings – please specify in free text                                                                                                                                                  |
| Q 2.5 | Before POC-US you registered these tentative diagnoses (inserted text) Have your tentative diagnoses changed?                       | Yes, the diagnoses have changed but the ICPC2 codes are the same<br>Yes, the diagnoses have changed and the ICPC2 codes have also changed<br>No*                                                                                                                                              |
| Q 2.6 | What is the tentative diagnosis for this patient now?                                                                               | ICPC2 codes                                                                                                                                                                                                                                                                                   |
| Q 2.7 | Are there any other possible tentative diagnoses for this patient (please specify)?                                                 | ICPC2 codes                                                                                                                                                                                                                                                                                   |
| Q 2.8 | How is your confidence in your main tentative diagnosis, after you have used POC-US?                                                | Highly increased confidence<br>More confidence<br>unchanged confidence<br>Less confidence<br>Highly reduced confidence.                                                                                                                                                                       |
| Q 2.9 | Before POC-US you registered this plan (inserted text) for the patient. Has your overall plan changed?                              | Yes<br>No**                                                                                                                                                                                                                                                                                   |
| Q 3.0 | What is your overall plan for this patient, now?                                                                                    | Acute admission to hospital<br>Subacute referral to hospital<br>Elective referral hospital<br>Subacute referral to specialist<br>Elective referral to specialist<br>Referral to radiology<br>Other referral e.g. physiotherapist<br>Follow-up in the clinic<br>No plan for follow-up<br>Other |
| Q 3.1 | Before POC-US you registered this treatment (inserted text) for the patient. Has your initiated treatment for this patient changed? | Yes<br>No*                                                                                                                                                                                                                                                                                    |
| Q 3.2 | Which treatment will you initiate at this stage?                                                                                    | Medication<br>I will refer for treatment<br>I will initiate other treatment<br>None<br>Other                                                                                                                                                                                                  |

\* Move on to Q2.8

\*\* Move on to Q3.1
