# Supplementary material for: Use and impact of point-of-care ultrasonography in general practice: a prospective observational study
Source: PubMed Central journal article supplement — BMJ Open. 2020 Sep 17;10(9):e037664. doi: 10.1136/bmjopen-2020-037664 (PMC7500300; doi:10.1136/bmjopen-2020-037664), 2020-09-17
Supplement: bmjopen-2020-037664supp004.pdf [file bmjopen-2020-037664supp004.pdf]

## Appendix 4: ICPC2 codes registered in the study

Diagnoses registered according to the international classification of primary care 2<sup>nd</sup> edition (ICPC2)<sup>1</sup>.

|                      |
|----------------------|
| SYMPTOMS/COMPLAINTS  |
| INFECTIONS           |
| NEOPLASMS            |
| INJURIES             |
| CONGENITAL ANOMALIES |
| OTHER DIAGNOSES      |

### General and Unspecified A

| ICPC2                             | Before ICPC2 1 | Before ICPC2 2 | Before ICPC2 3 | Before ICPC2 4 | After ICPC2 1 | After ICPC2 2 | After ICPC2 3 |
|-----------------------------------|----------------|----------------|----------------|----------------|---------------|---------------|---------------|
| A08 Swelling                      | 8              |                |                |                | 1             |               |               |
| A26 Fear of cancer NOS            | 1              |                |                |                |               |               |               |
| A77 Viral disease other/NOS       |                |                |                |                | 1             |               |               |
| A79 Malignancy NOS                |                |                |                |                |               | 1             |               |
| A85 Adverse effect medical agent  |                | 2              |                |                | 1             | 1             |               |
| A94 Perinatal morbidity other     |                | 1              |                |                |               |               |               |
| A97 No disease                    |                |                |                |                | 1             |               |               |
| A98 Health maintenance/prevention | 1              |                |                |                |               | 1             |               |

### Blood, Blood Forming Organs and Immune Mechanism B

| ICPC2                               | Before ICPC2 1 | Before ICPC2 2 | Before ICPC2 3 | Before ICPC2 4 | After ICPC2 1 | After ICPC2 2 | After ICPC2 3 |
|-------------------------------------|----------------|----------------|----------------|----------------|---------------|---------------|---------------|
| B02 Lymph gland(s) enlarged/painful | 5              |                |                |                | 1             |               |               |
| B27 Fear blood/lymph disease other  |                |                |                |                | 1             |               |               |
| B76 Ruptured spleen traumatic       | 1              |                |                |                | 1             |               |               |

### Digestive D

| ICPC2                                  | Before ICPC2 1 | Before ICPC2 2 | Before ICPC2 3 | Before ICPC2 4 | After ICPC2 1 | After ICPC2 2 | After ICPC2 3 |
|----------------------------------------|----------------|----------------|----------------|----------------|---------------|---------------|---------------|
| D01 Abdominal pain/cramps general      | 7              |                |                |                | 3             |               |               |
| D02 Abdominal pain epigastric          | 5              | 1              |                |                | 3             |               |               |
| D06 Abdominal pain localized other     | 9              | 1              |                |                | 3             | 1             |               |
| D07 Dyspepsia/indigestion              | 2              | 2              |                |                | 3             |               |               |
| D08 Flatulence/gas/belching            | 1              |                |                |                |               |               |               |
| D11 Diarrhoea                          | 1              |                |                |                | 1             |               |               |
| D12 Constipation                       | 1              | 1              | 1              |                | 2             |               |               |
| D21 Swallowing problem                 | 1              |                |                |                | 1             |               |               |
| D23 Hepatomegaly                       | 1              |                |                |                |               |               |               |
| D24 Abdominal mass                     | 2              | 1              |                |                | 1             |               |               |
| D25 Abdominal distension               | 2              |                |                |                | 2             |               |               |
| D27 Fear of digestive disease other    |                |                |                |                | 1             |               |               |
| D73 Gastroenteritis presumed infection |                | 2              |                |                | 1             | 2             |               |
| D75 Malignant neoplasm colon/rectum    |                |                |                |                |               | 1             |               |
| D77 Malig. neoplasm digest other       |                |                |                |                |               | 1             | 1             |
| D78 Neoplasm digest benign/uncertain   |                |                |                |                | 1             |               |               |

|                                     |    |   |   |   |   |   |  |
|-------------------------------------|----|---|---|---|---|---|--|
| D84 Oesophagus disease              |    |   |   |   | 1 |   |  |
| D86 Peptic ulcer other              |    |   |   |   | 1 |   |  |
| D88 Appendicitis                    | 1  | 1 |   |   | 1 |   |  |
| D89 Inguinal hernia                 | 1  |   |   |   | 1 |   |  |
| D91 Abdominal hernia other          |    |   |   |   | 1 |   |  |
| D92 Diverticular disease            | 1  | 1 |   | 1 | 3 | 1 |  |
| D93 Irritable bowel syndrome        |    |   |   |   | 2 |   |  |
| D97 Liver disease NOS               |    |   | 1 |   | 1 |   |  |
| D98 Cholecystitis/cholelithiasis    | 14 | 5 |   |   | 9 | 4 |  |
| D99 Disease digestive system, other |    | 1 |   |   |   |   |  |

### Cardiovascular K

| ICICP2                                 | Before ICPC2 1 | Before ICPC2 2 | Before ICPC2 3 | Before ICPC2 4 | After ICPC2 1 | After ICPC2 2 | After ICPC2 3 |
|----------------------------------------|----------------|----------------|----------------|----------------|---------------|---------------|---------------|
| K02 Pressure/tightness of heart        | 1              |                |                |                |               |               |               |
| K04 Palpitations/awareness of heart    | 1              |                |                |                |               |               |               |
| K06 Prominent veins                    |                | 1              |                |                |               | 1             |               |
| K07 Swollen ankles/oedema              | 1              |                |                |                | 2             | 1             |               |
| K22 Risk factor cardiovascular disease | 1              |                |                |                | 1             |               |               |
| K24 Fear of heart disease              | 1              | 1              |                |                | 1             | 1             |               |
| K27 Fear cardiovascular disease other  |                |                |                |                | 1             |               |               |
| K28 Limited function/disability (k)    | 1              |                |                |                |               |               |               |
| K29 Cardiovascular sympt./compl. other |                |                |                |                |               |               |               |
| K77 Heart failure                      | 9              | 6              |                |                | 4             | 2             |               |
| K78 Atrial fibrillation/flutter        |                | 2              |                |                |               | 1             |               |
| K79 Paroxysmal tachycardia             |                |                |                |                | 1             |               |               |
| K84 Heart disease other                | 5              |                |                |                | 1             | 2             |               |
| K85 Elevated blood pressure            |                |                |                |                | 1             |               |               |
| K86 Hypertension uncomplicated         |                |                | 1              |                | 16            |               | 1             |
| K87 Hypertension complicated           |                |                |                |                | 1             |               |               |
| K92 Atherosclerosis/PVD                | 4              |                |                |                | 3             |               |               |
| K93 Pulmonary embolism                 | 1              |                |                |                |               |               |               |
| K94 Phlebitis/thrombophlebitis         | 7              | 3              |                |                | 2             |               |               |
| K95 Varicose veins of leg              | 2              | 2              |                |                | 5             |               |               |
| K99 Cardiovascular disease other       | 17             | 4              |                |                | 3             |               |               |

### Musculoskeletal L

| ICICP2                                | Before ICPC2 1 | Before ICPC2 2 | Before ICPC2 3 | Before ICPC2 4 | After ICPC2 1 | After ICPC2 2 | After ICPC2 3 |
|---------------------------------------|----------------|----------------|----------------|----------------|---------------|---------------|---------------|
| L02 Back symptom/complaint            | 1              | 1              | 1              |                | 2             | 1             |               |
| L04 Chest symptom/complaint           | 3              | 1              |                |                | 2             |               |               |
| L05 Flank/axilla symptom/complaint    | 2              |                |                |                | 1             |               |               |
| L08 Shoulder symptom/complaint        | 25             | 2              |                |                | 11            | 1             |               |
| L09 Arm symptom/complaint             | 3              |                |                |                | 2             |               |               |
| L10 Elbow symptom/complaint           | 3              |                |                |                | 4             |               |               |
| L11 Wrist symptom/complaint           | 1              |                |                |                | 1             |               |               |
| L12 Hand/finger symptom/complaint     | 2              |                |                |                | 2             |               |               |
| L13 Hip symptom/complaint             | 5              |                |                |                | 2             |               |               |
| L14 Leg/thigh symptom/complaint       | 3              | 1              |                |                | 3             |               |               |
| L15 Knee symptom/complaint            | 18             | 1              |                |                | 11            | 1             |               |
| L16 Ankle symptom/complaint           | 3              |                |                |                | 3             |               |               |
| L17 Foot/toe symptom/complaint        | 6              |                |                |                | 5             |               |               |
| L18 Muscle pain                       | 2              |                |                | 1              | 1             |               |               |
| L19 Muscle symptom/complaint NOS      | 1              | 3              |                |                | 2             | 1             |               |
| L20 Joint symptom/complaint NOS       | 4              |                |                |                | 3             | 1             |               |
| L70 Infections musculoskeletal system |                | 1              |                |                |               |               |               |

|                                       |    |    |   |   |    |   |   |
|---------------------------------------|----|----|---|---|----|---|---|
| L72 Fracture: radius/ulna             | 1  |    |   |   | 1  |   |   |
| L74 Fracture: hand/foot bone          |    | 1  |   |   |    |   |   |
| L76 Fracture: other                   | 6  |    |   |   | 4  |   |   |
| L77 Sprain/strain of ankle            |    | 1  |   |   |    | 1 |   |
| L78 Sprain/strain of knee             | 2  | 1  |   |   | 4  |   |   |
| L79 Sprain/strain of joint NOS        | 1  | 1  |   |   | 2  | 2 |   |
| L80 Dislocation/subluxation           |    |    |   | 1 | 1  |   |   |
| L81 Injury musculoskeletal NOS        | 3  | 3  |   |   | 5  | 2 |   |
| L84 Back syndrome w/o radiating pain  | 1  |    |   |   | 1  |   |   |
| L86 Back syndrome with radiating pain |    |    |   |   | 1  |   |   |
| L87 Bursitis/tendinitis/synovitis NOS | 52 | 11 | 1 |   | 67 | 7 |   |
| L90 Osteoarthritis of knee            | 1  | 2  |   |   | 2  | 2 |   |
| L91 Osteoarthritis other              | 3  | 1  |   |   | 4  | 1 |   |
| L92 Shoulder syndrome                 | 7  | 5  | 1 |   | 15 | 4 |   |
| L93 Tennis elbow                      | 2  |    |   |   | 2  |   |   |
| L96 Acute internal damage knee        |    | 1  |   |   |    | 1 |   |
| L97 Neoplasm benign/unspec musculo    | 1  |    |   |   | 2  |   |   |
| L99 Musculoskeletal disease, other    | 1  |    | 1 |   | 1  |   | 1 |

### Neurological N

| ICICP2                                        | Before ICPC2 1 | Before ICPC2 2 | Before ICPC2 3 | Before ICPC2 4 | After ICPC2 1 | After ICPC2 2 | After ICPC2 3 |
|-----------------------------------------------|----------------|----------------|----------------|----------------|---------------|---------------|---------------|
| N06 Sensation disturbance other               |                | 1              |                |                | 1             |               |               |
| N82 (scannede nyre –positivt fund)– evt R82?? |                |                |                |                | 1             |               |               |

### Psychological P

| ICICP2                            | Before ICPC2 1 | Before ICPC2 2 | Before ICPC2 3 | Before ICPC2 4 | After ICPC2 1 | After ICPC2 2 | After ICPC2 3 |
|-----------------------------------|----------------|----------------|----------------|----------------|---------------|---------------|---------------|
| P01 Feeling anxious/nervous/tense |                |                |                |                | 1             |               |               |
| P02 Acute stress reaction         |                |                |                |                | 2             |               |               |

### Respiratory R

| ICICP2                                           | Before ICPC2 1 | Before ICPC2 2 | Before ICPC2 3 | Before ICPC2 4 | After ICPC2 1 | After ICPC2 2 | After ICPC2 3 |
|--------------------------------------------------|----------------|----------------|----------------|----------------|---------------|---------------|---------------|
| R01 Pain respiratory system                      | 1              |                |                |                | 1             |               |               |
| R02 Shortness of breath/dyspnoea                 | 6              |                |                |                | 8             |               |               |
| R04 Breathing problem                            | 1              | 1              |                |                | 1             | 1             |               |
| R05 Cough                                        | 1              |                |                |                | 3             |               |               |
| R21 Throat symptom/complaint                     |                |                |                |                | 3             |               |               |
| R27 Fear of respiratory disease                  | 1              |                |                |                | 2             |               |               |
| R29 Respiratory symptom/complaint oth            | 1              |                |                |                |               |               |               |
| R74 Upper respiratory infection acute            |                | 5              |                |                | 1             | 1             |               |
| R78 Acute bronchitis/bronchiolitis               |                | 6              |                |                | 1             | 4             |               |
| R80 Influenza                                    |                | 1              |                |                | 1             |               |               |
| R81 Pneumonia                                    | 17             | 1              |                |                | 11            |               |               |
| R82 Pleurisy/pleural effusion                    | 4              | 2              | 1              |                | 4             | 1             |               |
| R84 Malignant neoplasm bronchus/lung             | 1              |                |                |                | 1             |               |               |
| R88 Injury respiratory other                     |                | 1              |                |                |               |               |               |
| R91 (1. kode pleurit) måske det skulle være R92? |                | 1              |                |                | 1             |               |               |
| R95 Chronic obstructive pulmonary dis            |                | 3              | 1              |                | 2             | 3             |               |
| R96 Asthma                                       |                | 2              |                |                | 2             |               |               |

|                               |   |  |  |  |   |  |  |
|-------------------------------|---|--|--|--|---|--|--|
| R99 Respiratory disease other | 1 |  |  |  | 1 |  |  |
|-------------------------------|---|--|--|--|---|--|--|

### Skin S

| ICICP2                          | Before ICPC2 1 | Before ICPC2 2 | Before ICPC2 3 | Before ICPC2 4 | After ICPC2 1 | After ICPC2 2 | After ICPC2 3 |
|---------------------------------|----------------|----------------|----------------|----------------|---------------|---------------|---------------|
| S04 Lump/swelling localized     | 5              | 2              |                |                | 2             | 1             |               |
| S05 Lumps/swellings generalized | 1              |                |                |                | 1             |               |               |
| S10 Boil/carbuncle              | 4              | 4              |                |                | 2             | 2             |               |
| S15 Foreign body in skin        | 2              |                |                |                | 1             |               |               |
| S16 Bruise/contusion            | 1              | 2              | 1              |                | 3             | 1             | 1             |
| S18 Laceration/cut              |                |                |                |                | 1             |               |               |
| S76 Skin infection other        | 3              | 1              |                |                | 8             |               |               |
| S78 Lipoma                      | 2              | 1              | 1              |                | 5             | 1             | 1             |
| S93 Sebaceous cyst              |                |                |                |                | 2             |               |               |
| S99 Skin disease, other         |                |                |                |                | 1             |               |               |

### Endocrine/Metabolic and Nutritional T

| ICICP2                                 | Before ICPC2 1 | Before ICPC2 2 | Before ICPC2 3 | Before ICPC2 4 | After ICPC2 1 | After ICPC2 2 | After ICPC2 3 |
|----------------------------------------|----------------|----------------|----------------|----------------|---------------|---------------|---------------|
| T01 Excessive thirst                   |                | 1              |                |                |               | 1             |               |
| T07 Weight gain                        |                | 1              |                |                |               |               |               |
| T08 Weight loss                        | 1              |                |                |                | 1             |               |               |
| T11 Dehydration                        |                |                |                |                |               | 1             |               |
| T81 Goitre                             | 3              | 1              |                |                | 2             |               |               |
| T92 Gout                               | 3              |                |                |                | 2             |               |               |
| T99 Endocrine/metab/nutrit. dis. other | 1              | 2              |                |                | 1             | 1             |               |

### Urological U

| ICICP2                               | Before ICPC2 1 | Before ICPC2 2 | Before ICPC2 3 | Before ICPC2 4 | After ICPC2 1 | After ICPC2 2 | After ICPC2 3 |
|--------------------------------------|----------------|----------------|----------------|----------------|---------------|---------------|---------------|
| U01 Dysuria/painful urination        | 1              |                |                |                | 1             |               |               |
| U02 Urinary frequency/urgency        | 1              |                |                |                | 1             |               |               |
| U04 Incontinence urine               | 1              |                |                |                | 1             |               |               |
| U05 Urination problems other         | 2              |                |                |                | 2             |               |               |
| U06 Haematuria                       | 2              | 1              |                |                |               |               | 1             |
| U07 Urine symptom/complaint other    |                |                |                |                | 1             |               |               |
| U08 Urinary retention                | 8              | 2              | 1              |                | 8             | 2             |               |
| U13 Bladder symptom/complaint other  | 1              | 1              |                |                | 1             |               |               |
| U14 Kidney symptom/complaint         | 2              |                |                |                |               |               |               |
| U70 Pyelonephritis/pyelitis          |                | 2              |                |                |               |               |               |
| U71 Cystitis/urinary infection other | 5              | 2              | 2              |                | 11            | 2             | 1             |
| U78 Benign neoplasm urinary tract    | 1              |                |                |                | 1             |               |               |
| U79 Neoplasm urinary tract NOS       |                |                |                |                | 1             |               |               |
| U95 Urinary calculus                 | 6              | 1              |                |                | 4             | 3             |               |
| U99 Urinary disease, other           | 5              | 5              | 1              |                | 2             | 3             |               |

### Pregnancy, Childbearing, Family Planning W

| ICICP2                                 | Before ICPC2 1 | Before ICPC2 2 | Before ICPC2 3 | Before ICPC2 4 | After ICPC2 1 | After ICPC2 2 | After ICPC2 3 |
|----------------------------------------|----------------|----------------|----------------|----------------|---------------|---------------|---------------|
| W03 Antepartum bleeding                | 3              |                |                |                |               |               |               |
| W11 Contraception oral                 | 2              |                |                |                | 2             |               |               |
| W12 Contraception intrauterine         | 41             | 3              | 1              |                | 40            | 2             | 1             |
| W15 Infertility/subfertility           |                |                |                |                | 1             |               |               |
| W18 Post-partum symptom/complaint oth. |                |                |                |                | 1             |               |               |
| W27 Fear complications of pregnancy    | 3              |                |                |                | 1             |               |               |
| W29 Pregnancy symptom/complaint other  | 2              |                |                |                | 1             |               |               |
| W30                                    | 1              |                |                |                | 2             |               |               |
| W71 Infection complicating pregnancy   |                | 1              |                |                |               |               | 1             |
| W72 Malignant neoplasm relate to preg. | 1              |                |                |                | 1             |               |               |
| W78 Pregnancy                          | 58             | 4              |                |                | 62            | 1             |               |
| W80 Ectopic pregnancy                  | 1              | 3              | 1              |                |               | 2             |               |
| W82 Abortion spontaneous               | 4              | 3              |                |                | 2             |               |               |
| W83 Abortion induced                   | 1              |                |                |                | 1             |               |               |
| W84 Pregnancy high risk                | 2              | 1              |                |                | 3             | 1             |               |
| W96 Complications of puerperium other  | 1              |                |                |                |               |               |               |

### Female Genital X

| ICICP2                                    | Before ICPC2 1 | Before ICPC2 2 | Before ICPC2 3 | Before ICPC2 4 | After ICPC2 1 | After ICPC2 2 | After ICPC2 3 |
|-------------------------------------------|----------------|----------------|----------------|----------------|---------------|---------------|---------------|
| X01 Genital pain female                   | 1              | 1              | 1              |                |               | 1             | 1             |
| X05 Menstruation absent/scanty            | 2              |                |                |                | 1             |               |               |
| X06 Menstruation excessive                | 3              |                |                |                | 2             |               |               |
| X07 Menstruation irregular/frequent       | 1              | 1              |                |                | 2             | 1             |               |
| X08 Intermenstrual bleeding               | 3              |                |                |                | 1             |               |               |
| X11 Menopausal symptom/complaint          | 1              |                |                |                | 1             |               |               |
| X12 Postmenopausal bleeding               | 2              | 1              |                |                | 2             | 1             |               |
| X13 Postcoital bleeding                   | 2              |                |                |                | 1             |               |               |
| X14 Vaginal discharge                     | 1              | 1              |                |                |               | 1             |               |
| X15 Vaginal symptom/complaint other       | 1              |                |                |                | 1             |               |               |
| X17 Pelvis symptom/complaint female       | 5              |                |                |                | 4             |               |               |
| X19 Breast lump/mass female               | 2              | 1              |                |                | 1             |               |               |
| X25 Fear of genital cancer female         | 1              |                |                |                | 1             |               |               |
| X27 Fear genital/breast disease other (f) | 1              |                |                |                | 1             |               |               |
| X28 Limited function/disability (x)       |                |                |                |                | 1             |               |               |
| X29 Genital symptom/complmt female oth.   |                |                |                |                | 1             |               |               |
| X72 Genital candidiasis female            |                |                |                |                | 1             |               |               |
| X74 Pelvic inflammatory disease           |                | 2              |                |                |               |               |               |
| X77 Malignant neoplasm genital other (f)  |                |                |                |                | 2             | 1             |               |
| X78 Fibromyoma uterus                     |                | 1              | 1              |                | 4             | 1             |               |
| X79 Benign neoplasm breast female         |                | 1              |                |                |               | 1             |               |
| X80 Benign neoplasm female genital        |                | 1              |                | 1              | 3             |               |               |
| X81 Genital neoplasm oth/unspiced (f)     |                | 1              |                |                |               |               |               |
| X84 Vaginitis/vulvitis NOS                |                |                |                |                |               | 1             |               |
| X87 Uterovaginal prolapse                 | 1              |                |                |                | 1             | 1             |               |
| X92 Chlamydia infection genital (f)       |                |                |                |                |               | 1             |               |
| X99 Genital disease female, other         | 4              | 2              |                |                | 6             | 1             |               |

### Male Genital Y

| ICICP2                     | Before ICPC2 1 | Before ICPC2 2 | Before ICPC2 3 | Before ICPC2 4 | After ICPC2 1 | After ICPC2 2 | After ICPC2 3 |
|----------------------------|----------------|----------------|----------------|----------------|---------------|---------------|---------------|
| Y02 Pain in testis/scrotum | 2              |                |                |                | 1             |               |               |

|                                  |   |  |   |   |   |   |   |
|----------------------------------|---|--|---|---|---|---|---|
| Y74 Orchitis/epididymitis        |   |  |   |   | 1 |   |   |
| Y82 Hypospadias                  | 1 |  |   |   | 1 |   |   |
| Y85 Benign prostatic hypertrophy |   |  | 1 | 1 |   | 1 | 1 |

(1) The World Organization of Family Doctors' (WONCA) International Classification Committee (WICC). International Classification of Primary Care. 2015; Available at: <https://www.globalfamilydoctor.com/site/DefaultSite/filesystem/documents/Groups/WICC/International%20Classification%20of%20Primary%20Care%20Dec16.pdf>. Accessed 14 oct, 2019.
