# Supplementary material for: Use and impact of point-of-care ultrasonography in general practice: a prospective observational study
Source: PubMed Central journal article supplement — BMJ Open. 2020 Sep 17;10(9):e037664. doi: 10.1136/bmjopen-2020-037664 (PMC7500300; doi:10.1136/bmjopen-2020-037664), 2020-09-17
Supplement: bmjopen-2020-037664supp005.pdf [file bmjopen-2020-037664supp005.pdf]

## Appendix 5. Changes in registered tentative diagnoses codes before and after ultrasonography

| N=528                                 | Registrations<br>before ultrasound | Registrations<br>after ultrasound | Ultrasound entailed a<br>more specific diagnosis                                                                                       |
|---------------------------------------|------------------------------------|-----------------------------------|----------------------------------------------------------------------------------------------------------------------------------------|
|                                       | Number (%)                         | Number (%)                        |                                                                                                                                        |
| Number of patients with 1 ICPC2 code  | 371 (70.3)                         | 436 (82.6)                        | The number of patients<br>with >1 ICPC2 code was<br>reduced from 29.6% to 17.5%                                                        |
| Number of patients with 2 ICPC2 codes | 138 (26.1)                         | 81 (15.3)                         |                                                                                                                                        |
| Number of patients with 3 ICPC2 codes | 13 (2.5)                           | 11 (2.1)                          |                                                                                                                                        |
| Number of patients with 4 ICPC2 codes | 6 (1.1)                            | 0 (0.0)                           |                                                                                                                                        |
| Symptoms/complaints codes             | 249 (47.2)                         | 193 (36.6)                        | The number of patients with<br>symptom codes reduced while<br>the number of patients with<br>disease specific ICPC2 codes<br>increased |
| Infection codes                       | 33 (6.3)                           | 43 (8.1)                          |                                                                                                                                        |
| Neoplasms codes                       | 6 (1.1)                            | 21 (4.0)                          |                                                                                                                                        |
| Injuries codes                        | 17 (3.2)                           | 24 (4.5)                          |                                                                                                                                        |
| Congenital anomalies codes            | 1 (0.2)                            | 1 (0.2)                           |                                                                                                                                        |
| Other diagnoses codes                 | 221 (41.9)                         | 244 (46.2)                        |                                                                                                                                        |
| Wrong code                            | 0 (0.0)                            | 2 (0.4)                           |                                                                                                                                        |

\* Wrong code = Registered code in the questionnaire that did not translate into the ICPC2 coding system.

ICPC2= international Classification of primary care 2<sup>nd</sup> edition <sup>18</sup>
